# Supplementary material
Source: PubMed Central journal article supplement (PMC4313296)
Supplement: JCM.02115-14_zjm999093882so2.pdf [file JCM.02115-14_zjm999093882so2.pdf]

# Supplementary Figure 1

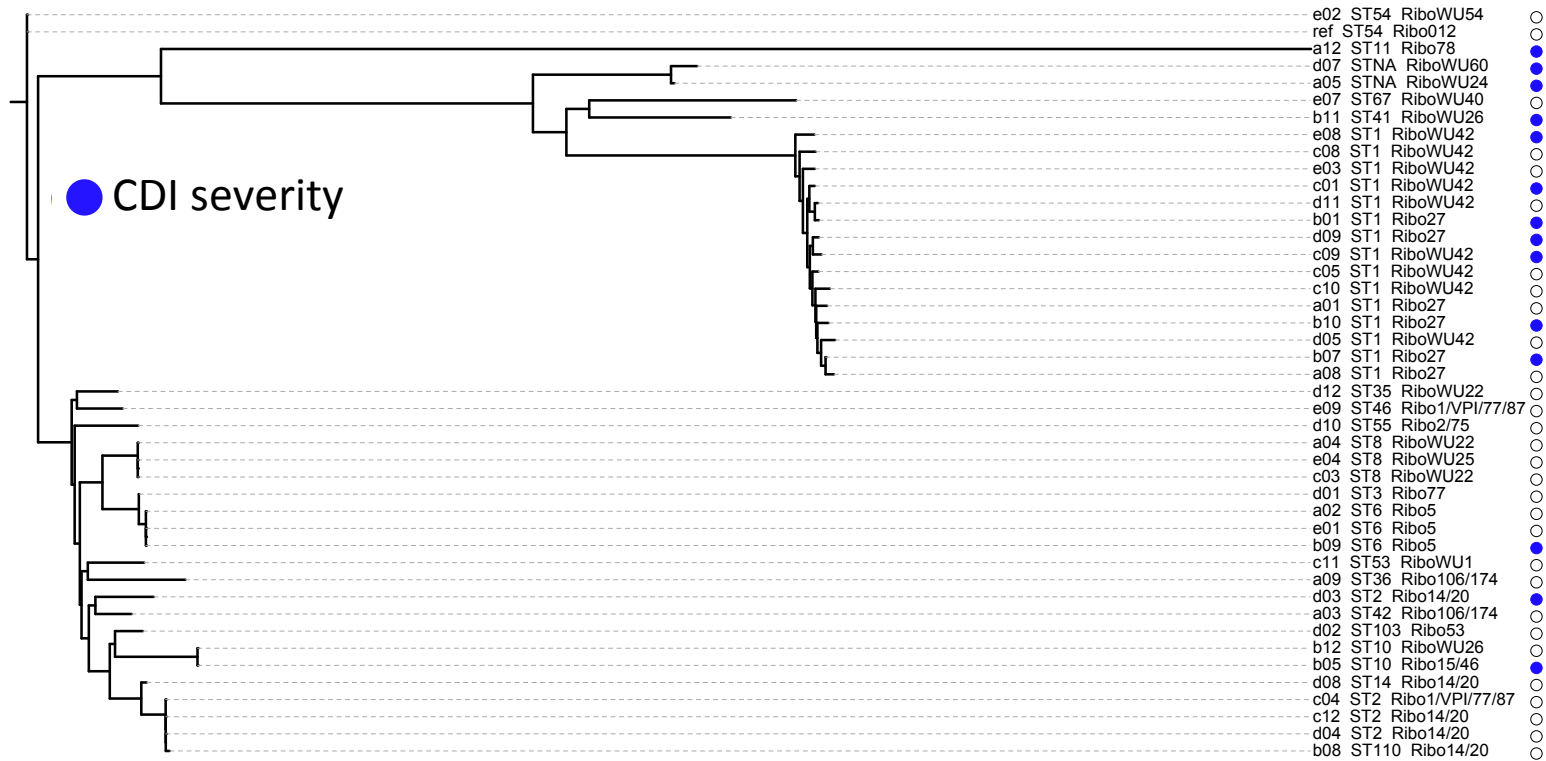

Fig S1. Phylogenetic tree of the 46 *C. difficile* strains based on the PaLoc SNPs. The tree was built in a similar manner from the SNPs in PaLoc. The tree is annotated by disease severity.
