# Supplementary material
Source: PubMed Central journal article supplement (PMC4313296)
Supplement: JCM.02115-14_zjm999093882so3.pdf [file JCM.02115-14_zjm999093882so3.pdf]

Supplementary Figure 2

tcdA

tcdC tcdR

tcdB

CD06620 tcdE

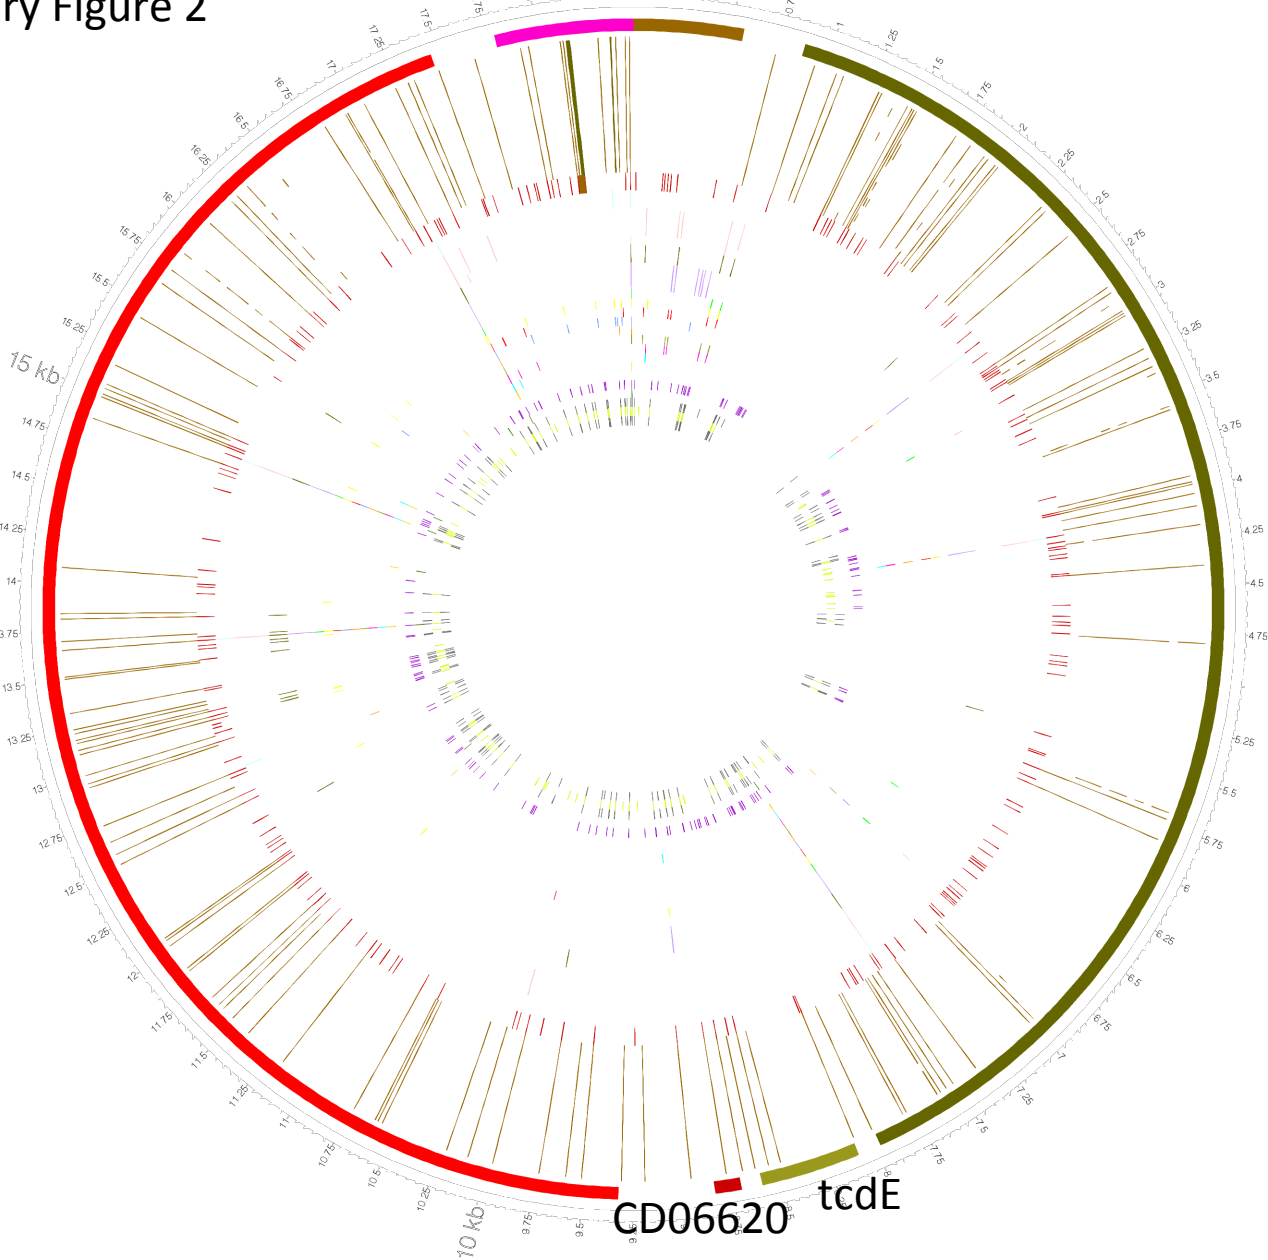

**Fig S2.** Circular plot of PaLoc of 43 toxigenic *C. difficile* strains. SNPs distribution in PaLoc is illustrated in in circular plot. The outside ring displays the six genes spanning the PaLoc. The rest of circles represent 43 strains from 21 ST types. Colors code for ST types. The circles represent the following from outside to inside: ST-1 (circle 1-8, non severe CDI strains; circle 9-15, severe CDI strain), ST-11(circle 16), ST-6 (circle 17-19), ST-2 (circle 20-23), ST-10 (circle 24-25), ST-8 (circle 26-28), followed by single strains in each ST type: ST-42, ST-36, ST-110, ST-53, ST-3, ST-103, ST-14, ST-55, ST-35, ST-54, ST-67, ST-46, ST-NA, ST-41, ST-NA.
